# Supplementary figures and images for: An Innovative Approach to Care: Integrating Mental Health Services Through Telemedicine in Rural School-Based Health Centers
Source: Atypon-hosted journal article supplement (doi:10.1176/appi.ps.201800252), 2018-12-17

Legend:

HPSA - Mental Health

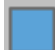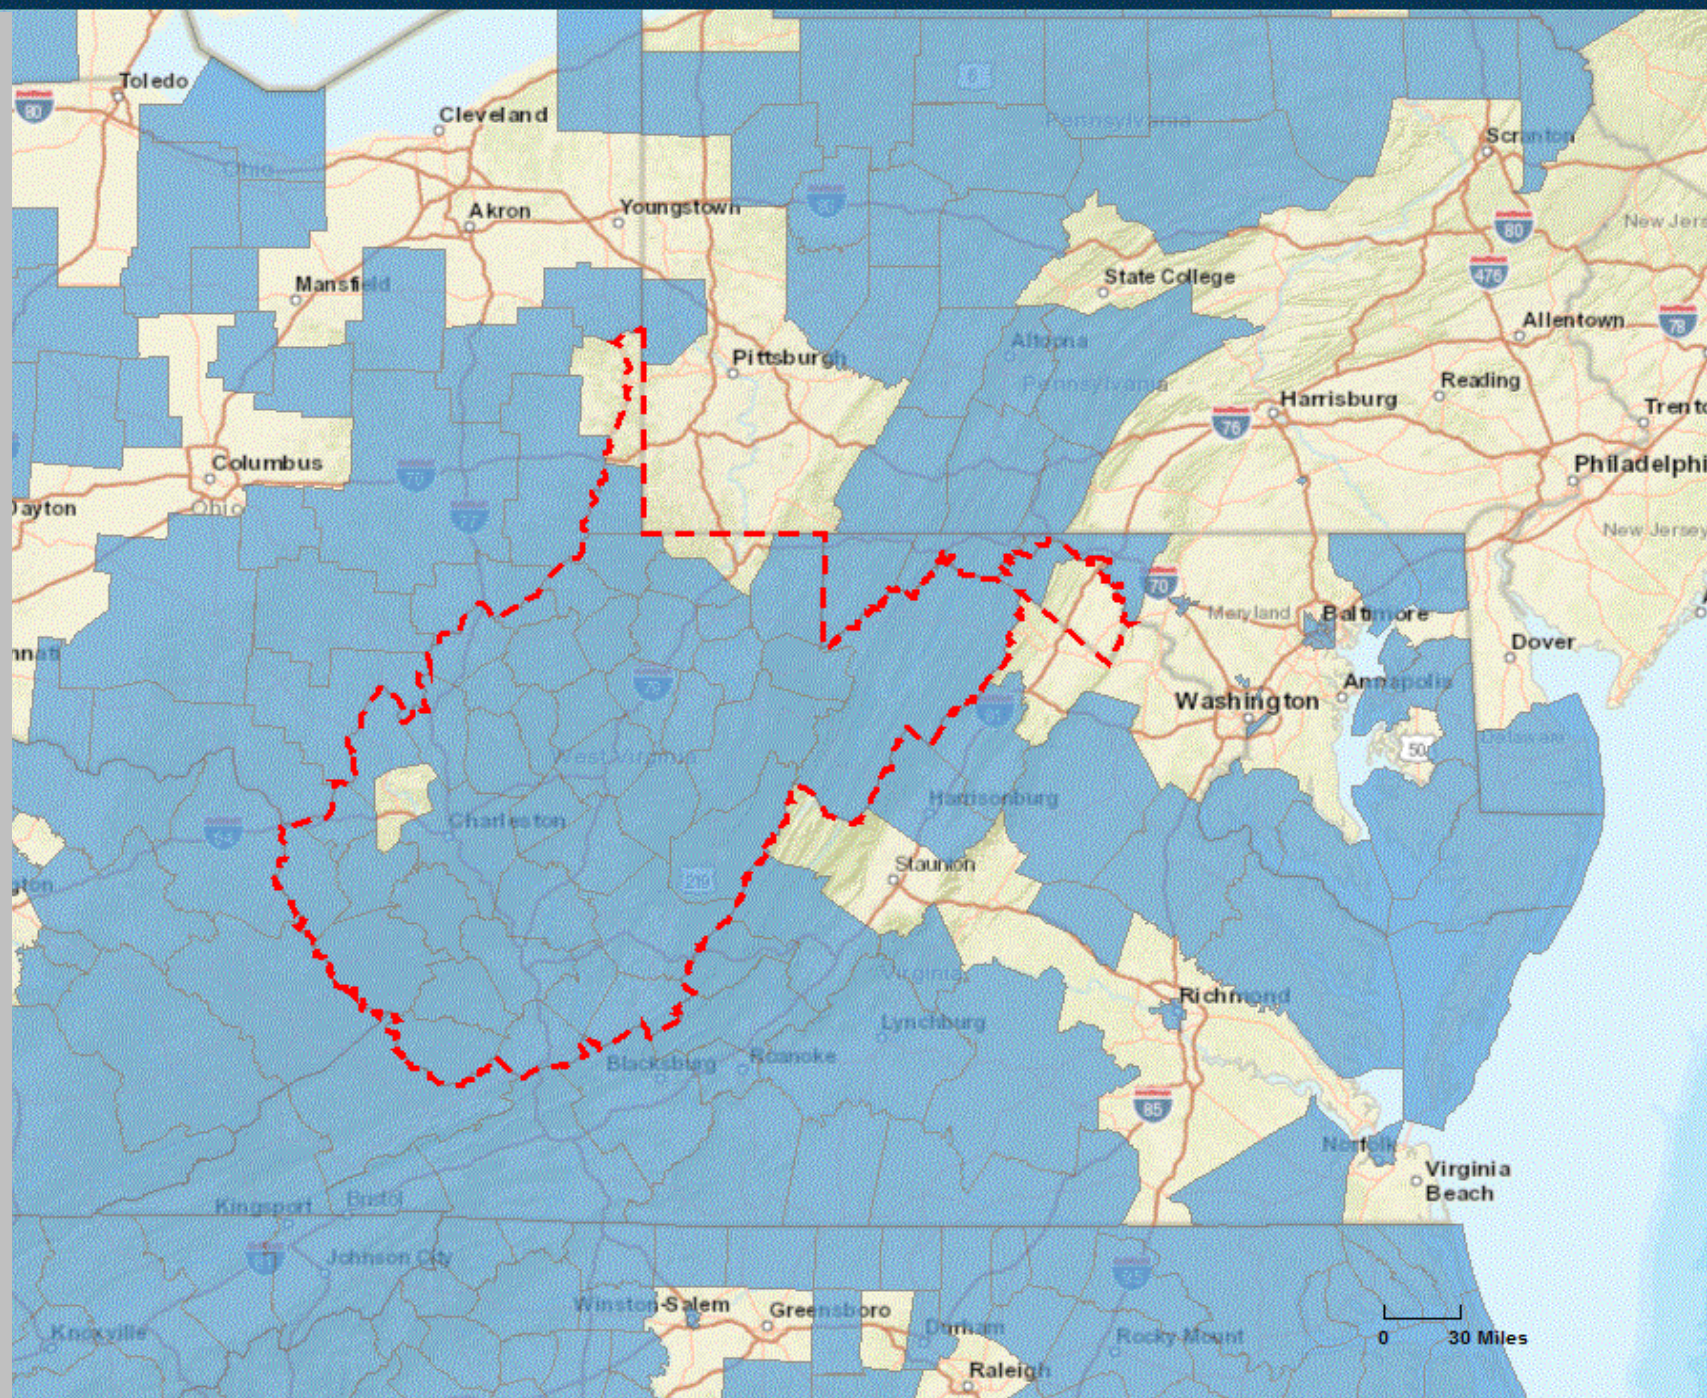

Supplement: appi.ps.201800252.ds001.pdf [file appi.ps.201800252.ds001.pdf]
